# Supplementary material for: Evolution of RLSB, a nuclear-encoded S1 domain RNA binding protein associated with post-transcriptional regulation of plastid-encoded rbcL mRNA in vascular plants
Source: PubMed Central journal article supplement (PMC4928308; doi:10.1186/s12862-016-0713-1), 2016-06-29
Supplement: 12862_2016_713_MOESM1_ESM.pdf [file 12862_2016_713_MOESM1_ESM.pdf]

**Additional File 1: Figure S1**

| Name        | Length | Score | CTP | CS-score | cTP-length |
|-------------|--------|-------|-----|----------|------------|
| Arabodopsis | 487    | 0.518 | Y   | 5.063    | 63         |
| Sphagnum    | 360    | 0.527 | Y   | 3.808    | 16         |
| Ph.patens   | 414    | 0.563 | Y   | 1.284    | 63         |
| selaginella | 434    | 0.577 | Y   | 4.327    | 64         |
| Populus     | 528    | 0.506 | Y   | -0.785   | 76         |
| S.bicolor   | 426    | 0.554 | Y   | 5.420    | 45         |
| Kalanchoe   | 506    | 0.561 | Y   | -1.476   | 69         |
| Musa        | 417    | 0.567 | Y   | 5.597    | 43         |
