# Supplementary material for: Evolution of RLSB, a nuclear-encoded S1 domain RNA binding protein associated with post-transcriptional regulation of plastid-encoded rbcL mRNA in vascular plants
Source: PubMed Central journal article supplement (PMC4928308; doi:10.1186/s12862-016-0713-1), 2016-06-29
Supplement: 12862_2016_713_MOESM2_ESM.pdf [file 12862_2016_713_MOESM2_ESM.pdf]

## Additional File 2: Table S1

| ALGAE                                                             |                    |             |                                                                                                                                 |
|-------------------------------------------------------------------|--------------------|-------------|---------------------------------------------------------------------------------------------------------------------------------|
| Organism name                                                     | Division           | Sample code | website link                                                                                                                    |
| <i>Sargassum thunbergii</i>                                       | Phaeophyta         | YRMA        | <a href="https://www.bioinfodata.org/Blast4OneKP/species?id=74">https://www.bioinfodata.org/Blast4OneKP/species?id=74</a>       |
| <i>Laminaria japonica</i>                                         | Phaeophyta         | QDTV        | <a href="https://www.bioinfodata.org/Blast4OneKP/species?id=57">https://www.bioinfodata.org/Blast4OneKP/species?id=57</a>       |
| <i>Chlorella minutissima</i>                                      | Chlorophyta        | MWAN        | <a href="https://www.bioinfodata.org/Blast4OneKP/species?id=742">https://www.bioinfodata.org/Blast4OneKP/species?id=742</a>     |
| <i>Chlamydomonas reinhardtii</i> ( <i>Chlamydomonas smithii</i> ) | Chlorophyta        | 3055        | <a href="http://www.uniprot.org/blast/uniprot/B201605198A530B6CA0">http://www.uniprot.org/blast/uniprot/B201605198A530B6CA0</a> |
| <i>Roya obtusa</i>                                                | Chlorophyta        | XRTZ        | <a href="https://www.bioinfodata.org/Blast4OneKP/species?id=805">https://www.bioinfodata.org/Blast4OneKP/species?id=805</a>     |
| <i>Penium margaritaceum</i>                                       | Chlorophyta        | AEKF        | <a href="https://www.bioinfodata.org/Blast4OneKP/species?id=821">https://www.bioinfodata.org/Blast4OneKP/species?id=821</a>     |
| <i>Klebsormidium subtile</i>                                      | Chlorophyta        | FQLP        | <a href="https://www.bioinfodata.org/Blast4OneKP/species?id=791">https://www.bioinfodata.org/Blast4OneKP/species?id=791</a>     |
| <i>Mesotaenium endlicherianum</i>                                 | Chlorophyta        | WDCW        | <a href="https://www.bioinfodata.org/Blast4OneKP/species?id=800">https://www.bioinfodata.org/Blast4OneKP/species?id=800</a>     |
| <i>Coleochaete scutata</i>                                        | Chlorophyta        | VQBJ        | <a href="https://www.bioinfodata.org/Blast4OneKP/species?id=759">https://www.bioinfodata.org/Blast4OneKP/species?id=759</a>     |
| <i>Chondrus crispus</i>                                           | Rhodophyta         | UGPM        | <a href="https://www.bioinfodata.org/Blast4OneKP/species?id=1157">https://www.bioinfodata.org/Blast4OneKP/species?id=1157</a>   |
| <i>Gracilaria lemaneiformi</i>                                    | Rhodophyta         | IKWM        | <a href="https://www.bioinfodata.org/Blast4OneKP/species?id=1162">https://www.bioinfodata.org/Blast4OneKP/species?id=1162</a>   |
| BACTERIA                                                          |                    |             |                                                                                                                                 |
| Organism name                                                     | Family             | Organism ID | website link                                                                                                                    |
| <i>Rhodopseudomonas palustris</i> (strain ATCC BAA-98 / CGA009)   | Bradyrhizobiaceae  | 258594      | <a href="http://genome.microbedb.jp/cyanobase/Rhodopseudomonas">http://genome.microbedb.jp/cyanobase/Rhodopseudomonas</a>       |
| <i>Anabaena variabilis</i> ATCC 29413                             | Nostocaceae        | 240292      | <a href="http://genome.microbedb.jp/cyanobase/AVA">http://genome.microbedb.jp/cyanobase/AVA</a>                                 |
| <i>Arthrospira platensis</i> NIES-39                              | Arthrospira        | 696747      | <a href="http://genome.microbedb.jp/cyanobase/NIES39">http://genome.microbedb.jp/cyanobase/NIES39</a>                           |
| <i>Microcystis aeruginosa</i> NIES-843                            | Chroococcales      | 449447      | <a href="http://genome.microbedb.jp/cyanobase/Microcystis">http://genome.microbedb.jp/cyanobase/Microcystis</a>                 |
| <i>Prochlorococcus marinus</i> SS120                              | Prochlorococceae   | 167539      | <a href="http://genome.microbedb.jp/cyanobase/SS120">http://genome.microbedb.jp/cyanobase/SS120</a>                             |
| <i>Nostoc punctiforme</i> ATCC 29133                              | Nostocaceae        | 63737       | <a href="http://genome.microbedb.jp/cyanobase/NPUN">http://genome.microbedb.jp/cyanobase/NPUN</a>                               |
| <i>Escherichia coli</i> (strain K12 / DH10B)                      | Enterobacteriaceae | 316385      | <a href="http://www.uniprot.org/taxonomy/316385">http://www.uniprot.org/taxonomy/316385</a>                                     |
| <i>Staphylococcus aureus</i>                                      | Staphylococceae    | 703339      | <a href="http://www.ncbi.nlm.nih.gov/genome/?term=txid703339">http://www.ncbi.nlm.nih.gov/genome/?term=txid703339</a>           |
