# Supplementary material for: Evolution of RLSB, a nuclear-encoded S1 domain RNA binding protein associated with post-transcriptional regulation of plastid-encoded rbcL mRNA in vascular plants
Source: PubMed Central journal article supplement (PMC4928308; doi:10.1186/s12862-016-0713-1), 2016-06-29
Supplement: 12862_2016_713_MOESM4_ESM.pdf [file 12862_2016_713_MOESM4_ESM.pdf]

## Additional File 4: Figure S3

```
SDP      MDVLALSSASAAAPSASLAGKFLSFPSSRVRRNRENLLAKQKFLVSASKREEPKLNEDQMEINFGRLLGEDPKLTL
RLSB     MQTLLCQPKSLPILTASSSSSLIRSSGDVR-----
          *:. *   ... * . . :.* :...: . . **

SDP      AKIVARKVDPEASFIDIEKSFYKNKGKIPVEVEIPLDWSKDNKKKSTSSLDGLKLVKPVLDKGVKFERPVMKKPSPVLKK
RLSB     -----

SDP      PLVEAVAAPKVQRLPNVILRKPSSFYTSNGDDEESKLRKPNLTLKMRNERENERF-----SDMTLLR
RLSB     ECIDFRASEKVSQFHVTLSPFAFRGFS-ICREFAVRGAYGIR-----FCSREDVSGVGNNGGIVAEIEELLN
          :. : * : ** : . : . * : * . . * : * . :          *          :. : ** ,

SDP      KPPEVSVVAEEEDKPLSDDLTHEEGEQEGGTSQYTLLEKPEARLQPVNVEEVGDSGGVESSEIVNNSIQKPEARPELE
RLSB     KPNLPKSENEESGKADD-----DAILEPFLKFFKPEEEGE
          ** : * : . : ** . . *          . * : : : : . . * *

SDP      NIEEVADSGVLESSEIENNSIPTMQLNSEMSSEKT----INSDPLERIPSKI-----
RLSB     GIESEVSDETDRVSVEYY-DPKPGDFVGVVSGNENKLDVNIADMLGMLTKELPLYDKELDYLLCDLKYDAEEFLV
          . * : * : * . * * . : . * : : . : * : * : * : * : * : * : * : * : * : *

SDP      -----SQTIVEASLQGGPQRLDPSSAEPSPVNIIGKPSVNVHEGRQVSVELKGP---TRSSLEENDWNKAESL
RLSB     NKGMGIVKDDDEGVEIAEFARQGRP-----VVEIGTVVFAEVLGRTLS---GRPLSSRRYFRRIANHRVRQI
          . * : * : * : * * : * : * . : . * : * * * * : * : . . * : : : . :

SDP      VKTELRADELISSTRGFVSYGSLIGFLPYRNLAAKWKFLAFESWLRKGVDPSPYRQNLGVIGGQDVTSKSPDSS
RLSB     KQLNEPIEVKITEWNTGGLLTRIEGLRAFIPKQEL-----
          : : : * : : . . * * : . . * : * : * : * : *

SDP      LDSEVATTINGEVSSDMKLEDLLMVDREKQKFLSSVFGQIKVNVVMANRNSRKLIFSMPRENEEEVEKKRTLMAKLR
RLSB     -----VGRFLVQITRLNEDKNDLILSEKVAW-----EKLYLR
          * : : : * : : . * : . . . * : * : * :

SDP      VGDVVKCCIKKITYFGIFCELE--GVPALVHQSEVSWDATLDPASYFKIGQIVEAKVHQDLFALERIFLSLKEITPDPLT
RLSB     EGTLLLEGTVVKILPYGAQVKLGDSSRSLHISNITRR-----RIGSVS--DVLQVDESVK--VLVVKSLFPDKIS
          * : : : : * * : * : * . . * : * : * : : : * : * : * : * : * : * : * : * : * :

SDP      EALESVVGGDNDQLGGRLQAAELDAEWPVDESLLIKELEMEVGIQSVSKSRFFLSPGLAPTFQVYMAPMFENQYKLLARAG
RLSB     LSADLESE----PG-LFISDREKVFEAEEMAKKY--REKMLPVATSPISDRPPITSSFPQ-----
          : : . . . * * : : : : . . . * : * : * : * : * : * : * : * : * : *

SDP      NRVQELIVEASLSKEEMKSTIMSCTNRVE
RLSB     GKDEEIYANWENFKFESQ-----
          . : : * : . . * * :
```
