# Supplementary material for: Evolution of RLSB, a nuclear-encoded S1 domain RNA binding protein associated with post-transcriptional regulation of plastid-encoded rbcL mRNA in vascular plants
Source: BMC Evol Biol. 2016 Jun 29;16:141. doi: 10.1186/s12862-016-0713-1 (PMC4928308; doi:10.1186/s12862-016-0713-1)
Supplement: Additional file 3: Figure S2. — The primer sets used to amplify regions specific only for RLSB-a and for RLSB-b are shown. The amplified product sizes are 150 and 153 bp respectively. The regions where the left and right primers bind are indicated by arrows. (PDF 162 kb) [file 12862_2016_713_MOESM3_ESM.pdf]

### Additional File 3: Figure S2

RLSB-a

|              |                      |
|--------------|----------------------|
| LEFT PRIMER  | CCACTTCCATAACCCAGCAT |
| RIGHT PRIMER | ATTTACTCCAGGGGCACTA  |

Product size 150bp

1 ATGGTTCAAATTTCTGCATCATAGCTAAGCTGCTGACAAACAGCGACAGAGACATATCTGG  
61 TACTTGTTGACCATGCAAAGGTGAAGTGTGCTAGAGAACCTGCCAACCTGTTGAAGTCG  
121 AATACTGACCAGTGGTGGGTAGTTCTCCACTTCCATAACCCAGCATCAGTCATGGAGAAG  
                                        >>>>>>>>>>>>>>>>  
181 TATGTTGGACAGGAACAGGCAACTTCATCCCCGAGACAAGATAGGGTACAAGGTTTCCAG  
241 GCTGCAGAACATTGGTGTTCGAATTGCCTCATTCTTAGTGCCCCTGGAGTGAAATGTTG  
                                        <<<<<<<<<<<<<<<<  
301 TGATATCATTTTATCTGTCCGAGAATGTAGCTTCATTGCATTATGTTATGTCAAACCT  
361 AGTCGGGCTGCCCAAGCACTCCGTGCCAACAACTTGCATCTGCCCATGAAATAGATTCTG  
421 AAATTTTAGCACCGT

RLSB-b

|              |                      |
|--------------|----------------------|
| LEFT PRIMER  | ATCAACAGAAGAAGCGCTCG |
| RIGHT PRIMER | TAACCTAACCCACGCTCACC |

Product size 153bp

[illegible]
